# Supplementary material for: A facile strategy for fabricating self-healable, adhesive and highly sensitive flexible ionogel-based sensors
Source: Royal Society of Chemistry journal article supplement (doi:10.1039/d2tc04006a), 2022-01-01
Supplement: d2tc04006a3.pdf [file d2tc04006a3.pdf]

## Supporting Information

### **A facile strategy for fabricating self-healable, adhesive and highly sensitive flexible ionogel-based sensors**

Yingxue Wu,<sup>a</sup> Wenxing Jiang,<sup>a</sup> Tianyu Zhao,<sup>a</sup> Jiadong Wang,<sup>a</sup> Xianhong Zhang,<sup>a</sup> Dong Chen<sup>\*a</sup>  
Yuhong Ma,<sup>a</sup> and Wantai Yang<sup>\*ab</sup>

<sup>a</sup> State Key Laboratory of Chemical Resource Engineering, College of Materials Science and Engineering, Beijing University of Chemical Technology, Beijing 100029, China

<sup>b</sup> Beijing Advanced Innovation Centre for Soft Matter Science and Engineering, Beijing 100029, China

Corresponding authors: yangwt@mail.buct.edu.cn, chendong@mail.buct.edu.cn

**Preparation of MAH-2959.** The synthetic route of the polymerizable photoinitiators MAH-2959 is shown in Scheme S1. Irgacure 2959 (5.0 g, 22.3 mmol), MAH (2.3 g, 23.5 mmol) and 4-dimethylaminopyridine (DMAP, 0.01g) as catalyst were dissolved in anhydrous tetrahydrofuran (20 mL), and the reaction system was then stirred at 70 °C for 8h in the dark. The orange viscous product MAH-2959 was obtained after the removal of THF by rotary evaporation.

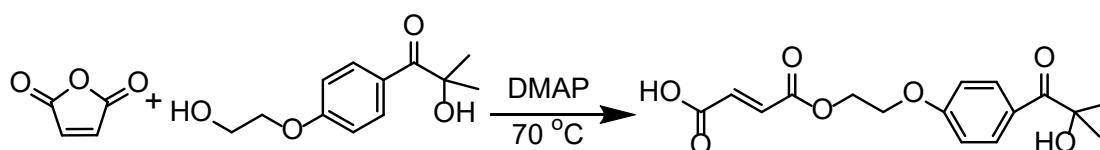

**Scheme S1.** The synthetic route of MAH-2959.

**Characterization of MAH-2959.** As shown in Fig. S1(a), the FTIR spectrum of MAH-2959 exhibited a typical C=O stretching vibration of ester groups at 1730  $\text{cm}^{-1}$ . The proton nuclear magnetic resonance ( $^1\text{H}$  NMR) spectrum in Fig. S1(b) further demonstrated the successful formation of polymerizable photoinitiator MAH-2959.

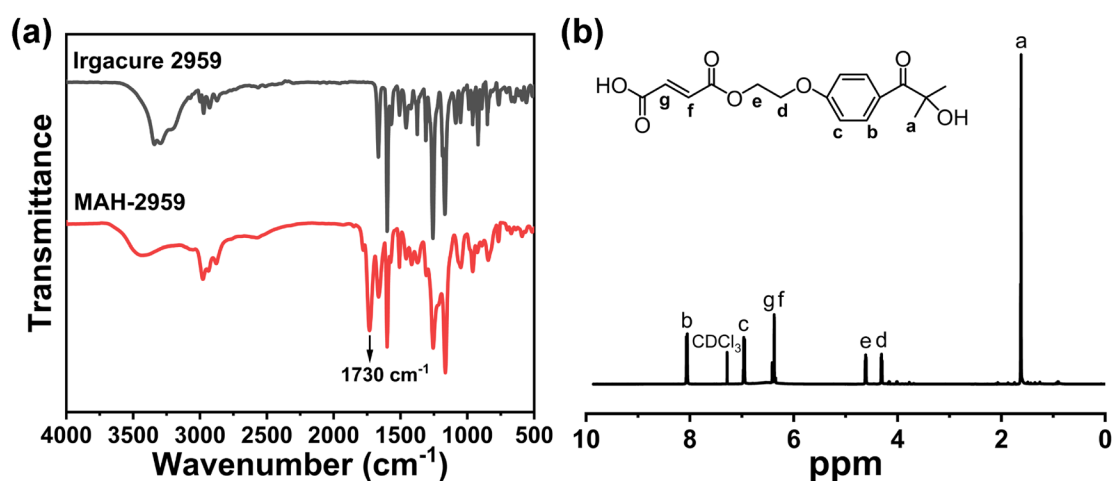

**Fig. S1** (a) FTIR spectra of Irgacure 2959 and MAH-2959, (b)  $^1\text{H}$  NMR spectrum of MAH-2959.

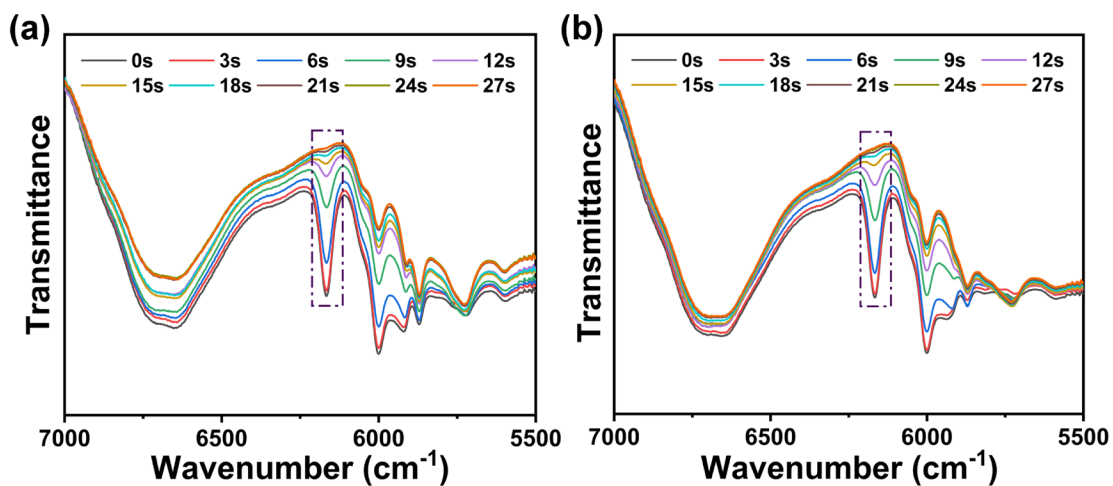

**Fig. S2** FTIR spectra of PEI/PAA/DES iongel prepared using (a) Irgacure 2959, (b) MAH-2959 in different reaction time.

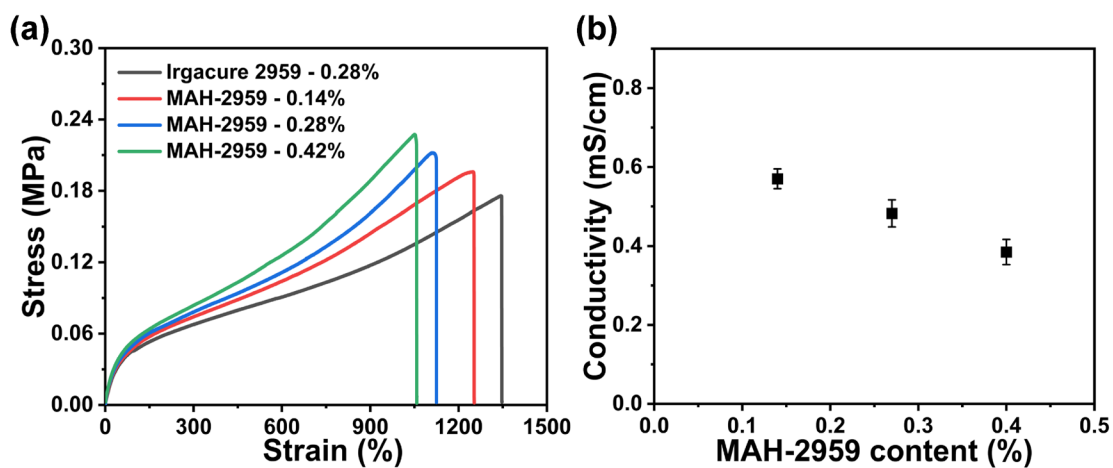

**Fig. S3** (a) Tensile stress-strain curves and (b) conductivities of PEI<sub>3.9</sub>/PAA<sub>9</sub>/DES<sub>72</sub> iongels prepared using different kind and content of photoinitiators.

**Table S1.** Compositions of PEI<sub>x</sub>/PAA<sub>y</sub>/DES<sub>z</sub> ionogels (0.28 wt%MAH-2959 relative to AA monomer, CCl-U:10.38g).

| Sample                                                     | AA(g) | Mass fraction of AA in ionogel (wt%) | PEI(g) | Mass fraction of PEI in ionogel (wt%) | Mass ratio of PEI/DES ( $\times 10^2$ ) | Mass ratio of PAA/PEI | Mass fraction of DES in ionogel (wt%) |
|------------------------------------------------------------|-------|--------------------------------------|--------|---------------------------------------|-----------------------------------------|-----------------------|---------------------------------------|
| PEI <sub>3.2</sub> /PAA <sub>11</sub> /DES <sub>72</sub>   | 3.69  | 26                                   | 0.336  | 2.3                                   | 3.2                                     | 11                    | 72                                    |
| PEI <sub>3.9</sub> /PAA <sub>9</sub> /DES <sub>72</sub>    | 3.63  | 25                                   | 0.403  | 2.8                                   | 3.9                                     | 9                     | 72                                    |
| PEI <sub>4.9</sub> /PAA <sub>7</sub> /DES <sub>72</sub>    | 3.53  | 25                                   | 0.504  | 3.5                                   | 4.9                                     | 7                     | 72                                    |
| PEI <sub>5.6</sub> /PAA <sub>6</sub> /DES <sub>72</sub>    | 3.45  | 24                                   | 0.576  | 4.0                                   | 5.6                                     | 6                     | 72                                    |
| PEI <sub>4.7</sub> /PAA <sub>9</sub> /DES <sub>68</sub>    | 4.39  | 29                                   | 0.488  | 3.2                                   | 4.7                                     | 9                     | 68                                    |
| PEI <sub>3.3</sub> /PAA <sub>9</sub> /DES <sub>75</sub>    | 3.11  | 23                                   | 0.345  | 2.5                                   | 3.3                                     | 9                     | 75                                    |
| PEI <sub>2.8</sub> /PAA <sub>9</sub> /DES <sub>78</sub>    | 2.63  | 20                                   | 0.292  | 2.2                                   | 2.8                                     | 9                     | 78                                    |
| PEI <sub>3.2</sub> /PAA <sub>11</sub> /DES <sub>72.4</sub> | 3.63  | 25                                   | 0.330  | 2.3                                   | 3.2                                     | 11                    | 72.4                                  |
| PEI <sub>5.0</sub> /PAA <sub>7</sub> /DES <sub>71.4</sub>  | 3.63  | 25                                   | 0.518  | 3.6                                   | 5.0                                     | 7                     | 71.4                                  |
| PEI <sub>7.0</sub> /PAA <sub>5</sub> /DES <sub>70.4</sub>  | 3.63  | 25                                   | 0.725  | 4.9                                   | 7.0                                     | 5                     | 70.4                                  |
| PEI <sub>3.9</sub> /PAA <sub>11</sub> /DES <sub>68.2</sub> | 4.43  | 29                                   | 0.403  | 2.6                                   | 3.9                                     | 11                    | 68.2                                  |
| PEI <sub>3.9</sub> /PAA <sub>7</sub> /DES <sub>76.3</sub>  | 2.82  | 21                                   | 0.403  | 3.0                                   | 3.9                                     | 7                     | 76.3                                  |
| PEI <sub>3.9</sub> /PAA <sub>5</sub> /DES <sub>81.1</sub>  | 2.02  | 16                                   | 0.403  | 3.1                                   | 3.9                                     | 5                     | 81.1                                  |

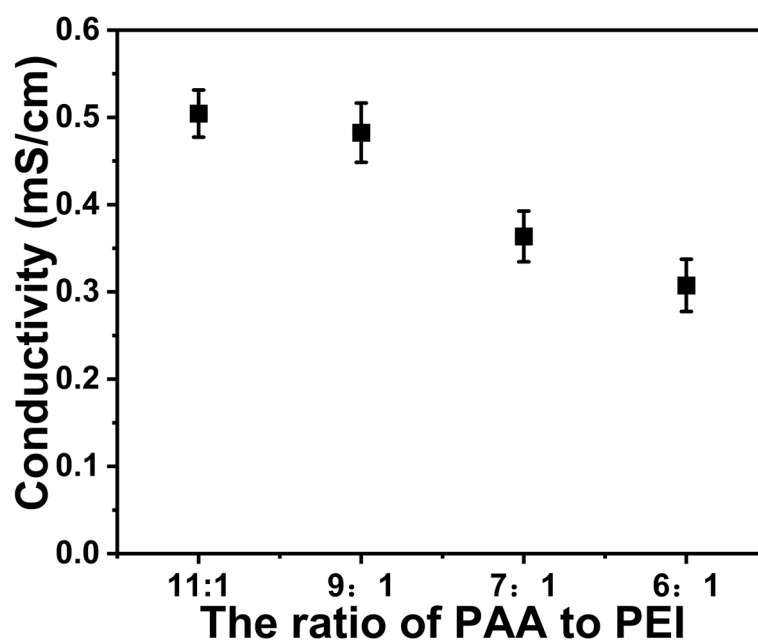

**Fig. S4** Conductivities of PEI<sub>3.2</sub>/PAA<sub>11</sub>/DES<sub>72</sub>, PEI<sub>3.9</sub>/PAA<sub>9</sub>/DES<sub>72</sub>, PEI<sub>4.9</sub>/PAA<sub>7</sub>/DES<sub>72</sub> and PEI<sub>5.6</sub>/PAA<sub>6</sub>/DES<sub>72</sub>.

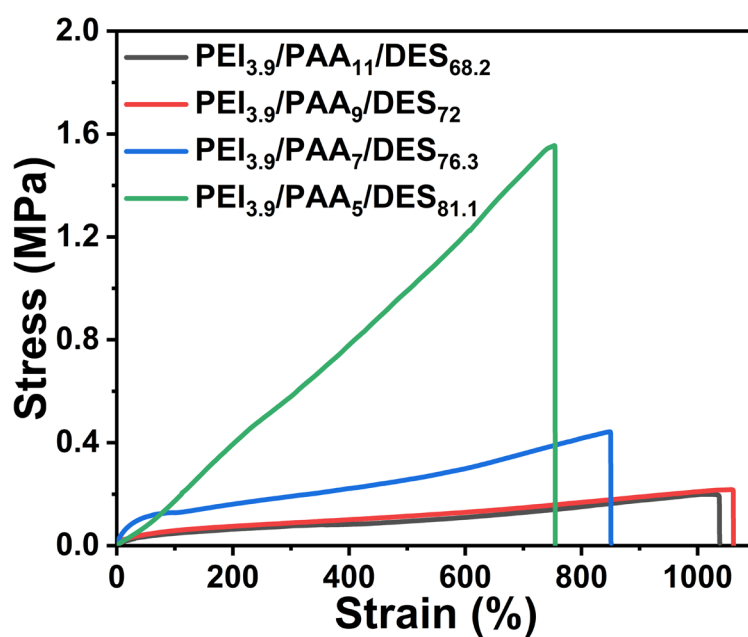

**Fig. S5** Tensile stress-strain curves of PEI<sub>3.9</sub>/PAA<sub>11</sub>/DES<sub>68.2</sub>, PEI<sub>3.9</sub>/PAA<sub>9</sub>/DES<sub>72</sub>, PEI<sub>3.9</sub>/PAA<sub>7</sub>/DES<sub>76.3</sub> and PEI<sub>3.9</sub>/PAA<sub>5</sub>/DES<sub>81.1</sub>.

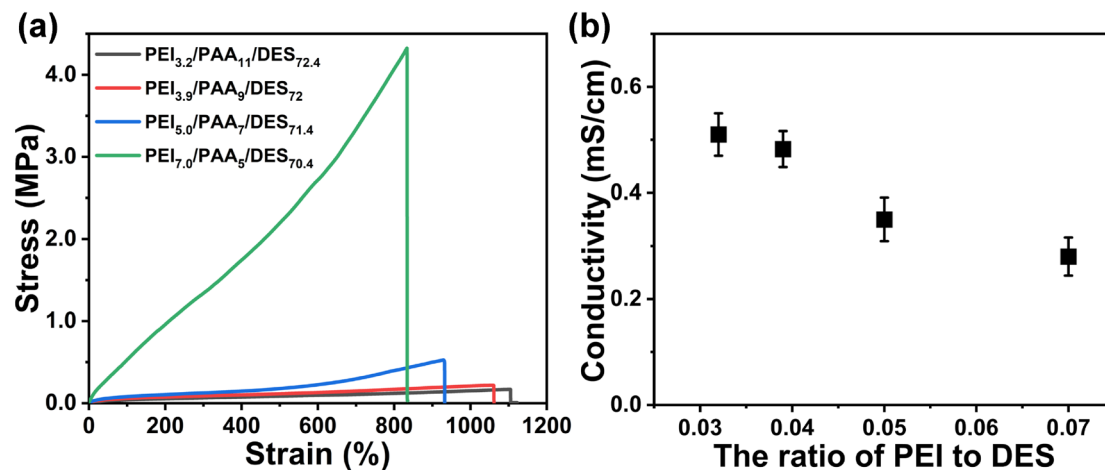

**Fig. S6** (a) Tensile stress-strain curves and (b) conductivities of PEI<sub>3.2</sub>/PAA<sub>11</sub>/DES<sub>72.4</sub>, PEI<sub>3.9</sub>/PAA<sub>9</sub>/DES<sub>72</sub>, PEI<sub>5.0</sub>/PAA<sub>7</sub>/DES<sub>71.4</sub> and PEI<sub>7.0</sub>/PAA<sub>5</sub>/DES<sub>70.4</sub>.

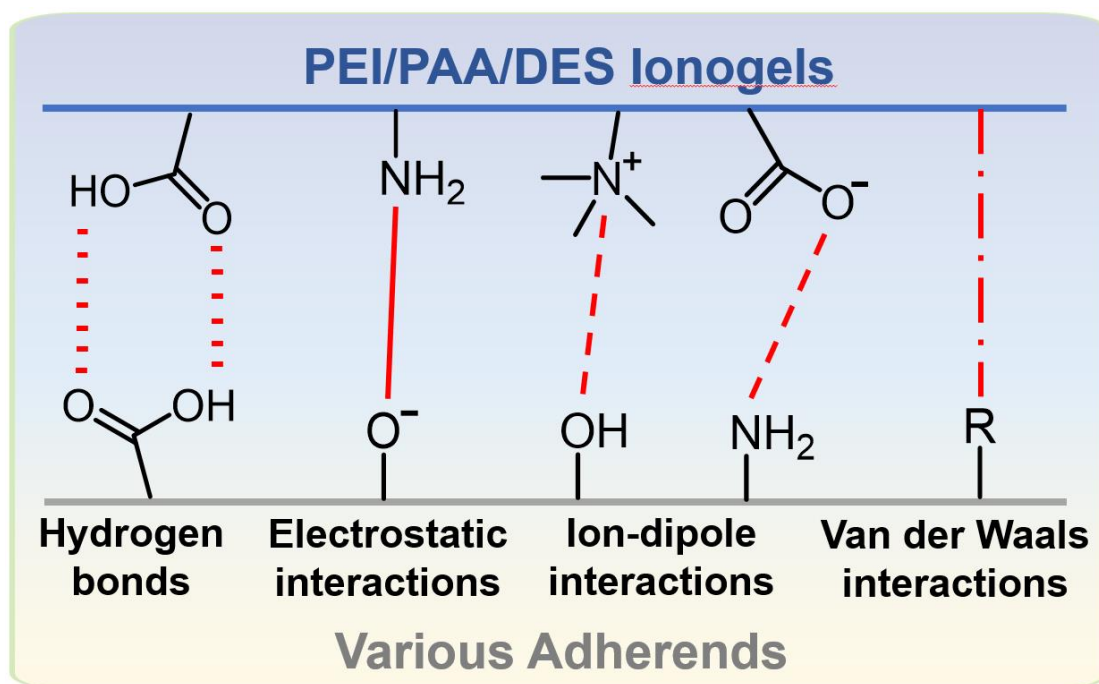

**Fig. S7** The possible adhesive mechanisms between PEI/PAA/DES ionogels and various adherends.

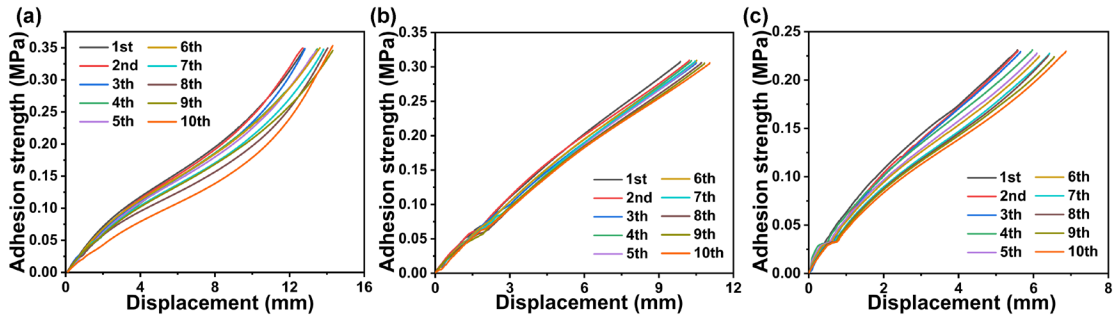

**Fig. S8** The curves of adhesion strength vs displacement for PEI<sub>3.9</sub>/PAA<sub>9</sub>/DES<sub>72</sub> to (a) wood, (b) glass and (c) PVC during repeated adhesion progress.

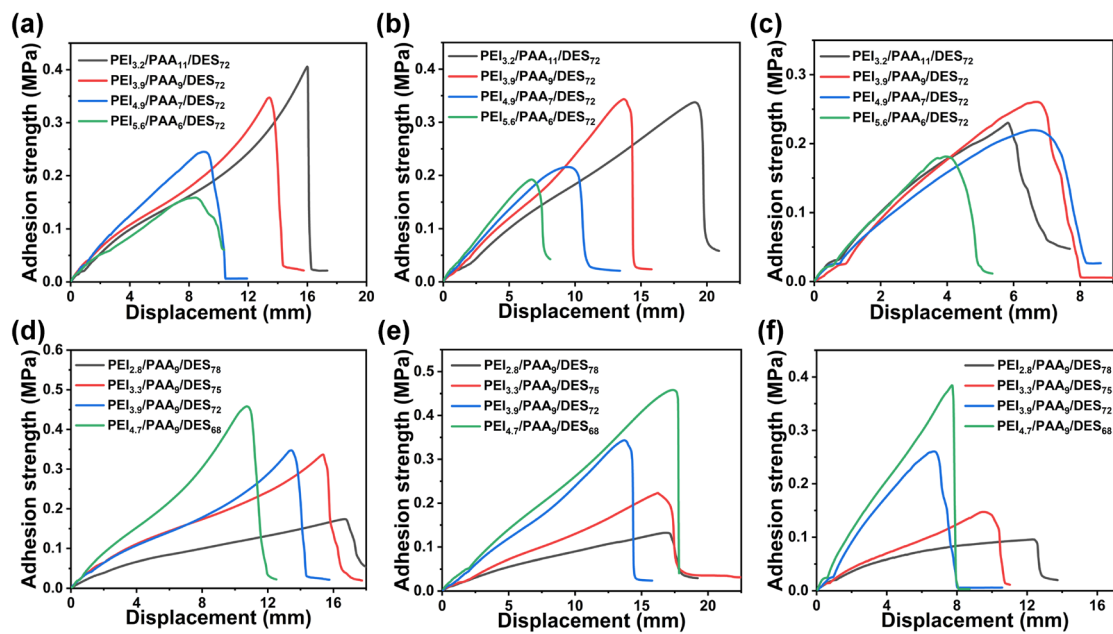

**Fig. S9** Representative curves of adhesion strength vs displacement for PEI<sub>x</sub>/PAA<sub>y</sub>/DES<sub>z</sub> to (a) wood, (b) glass and (c) PVC with different ratio of PAA/PEI, Representative curves of adhesion strength vs displacement for PEI<sub>x</sub>/PAA<sub>9</sub>/DES<sub>z</sub> to (d) wood, (e) glass and (f) PVC with different polymer content.

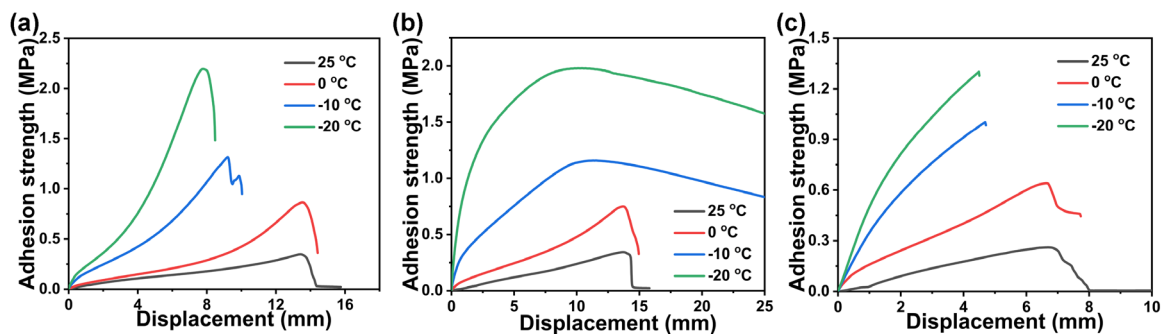

**Fig. S10** Representative curves of adhesion strength vs displacement for PEI<sub>3.9</sub>/PAA<sub>9</sub>/DES<sub>72</sub> to (a) wood, (b) glass and (c) PVC at different temperature.

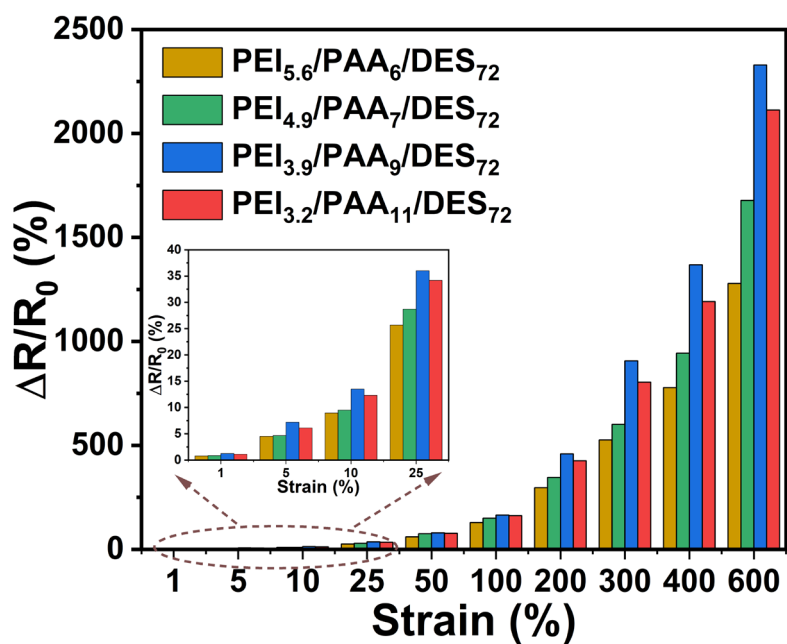

**Fig. S11** Relative resistance changes of PEI<sub>x</sub>/PAA<sub>y</sub>/DES<sub>72</sub> ionogels with different ratio of PAA/PEI as a function of tensile strain.



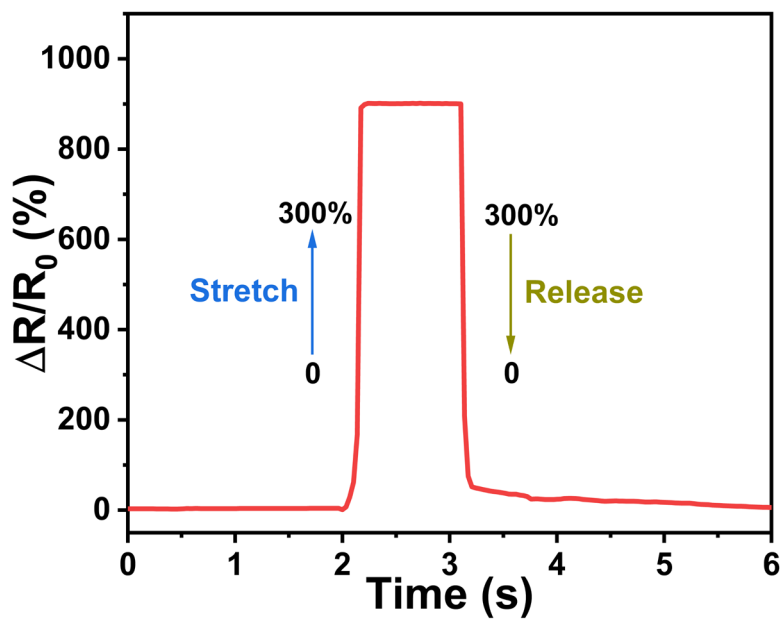

**Fig. S12** Resistance changes of the PEI<sub>3.9</sub>/PAA<sub>9</sub>/DES<sub>72</sub> ionogel in the instantaneous loading-unloading process.

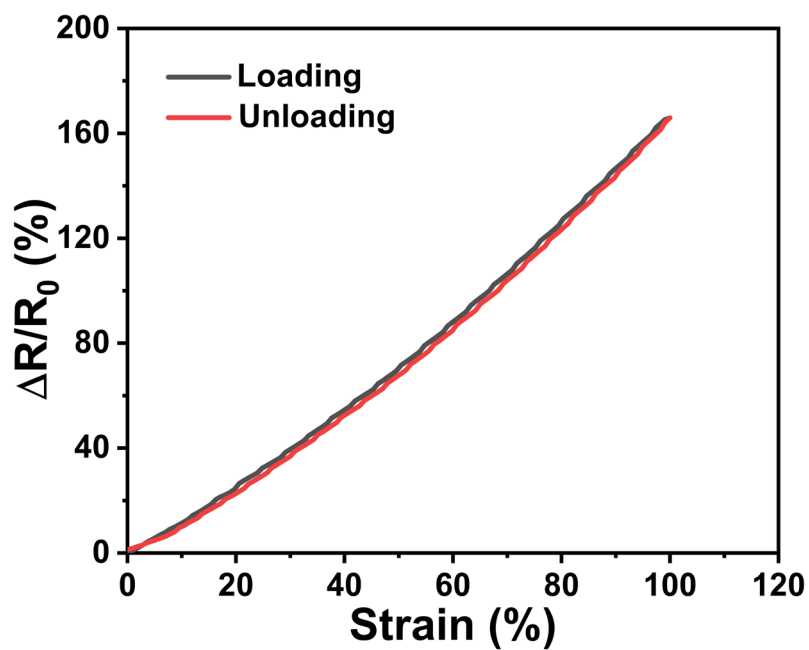

**Fig. S13** Hysteresis curve of the PEI<sub>3.9</sub>/PAA<sub>9</sub>/DES<sub>72</sub> ionogel strain sensor at 100% strain.

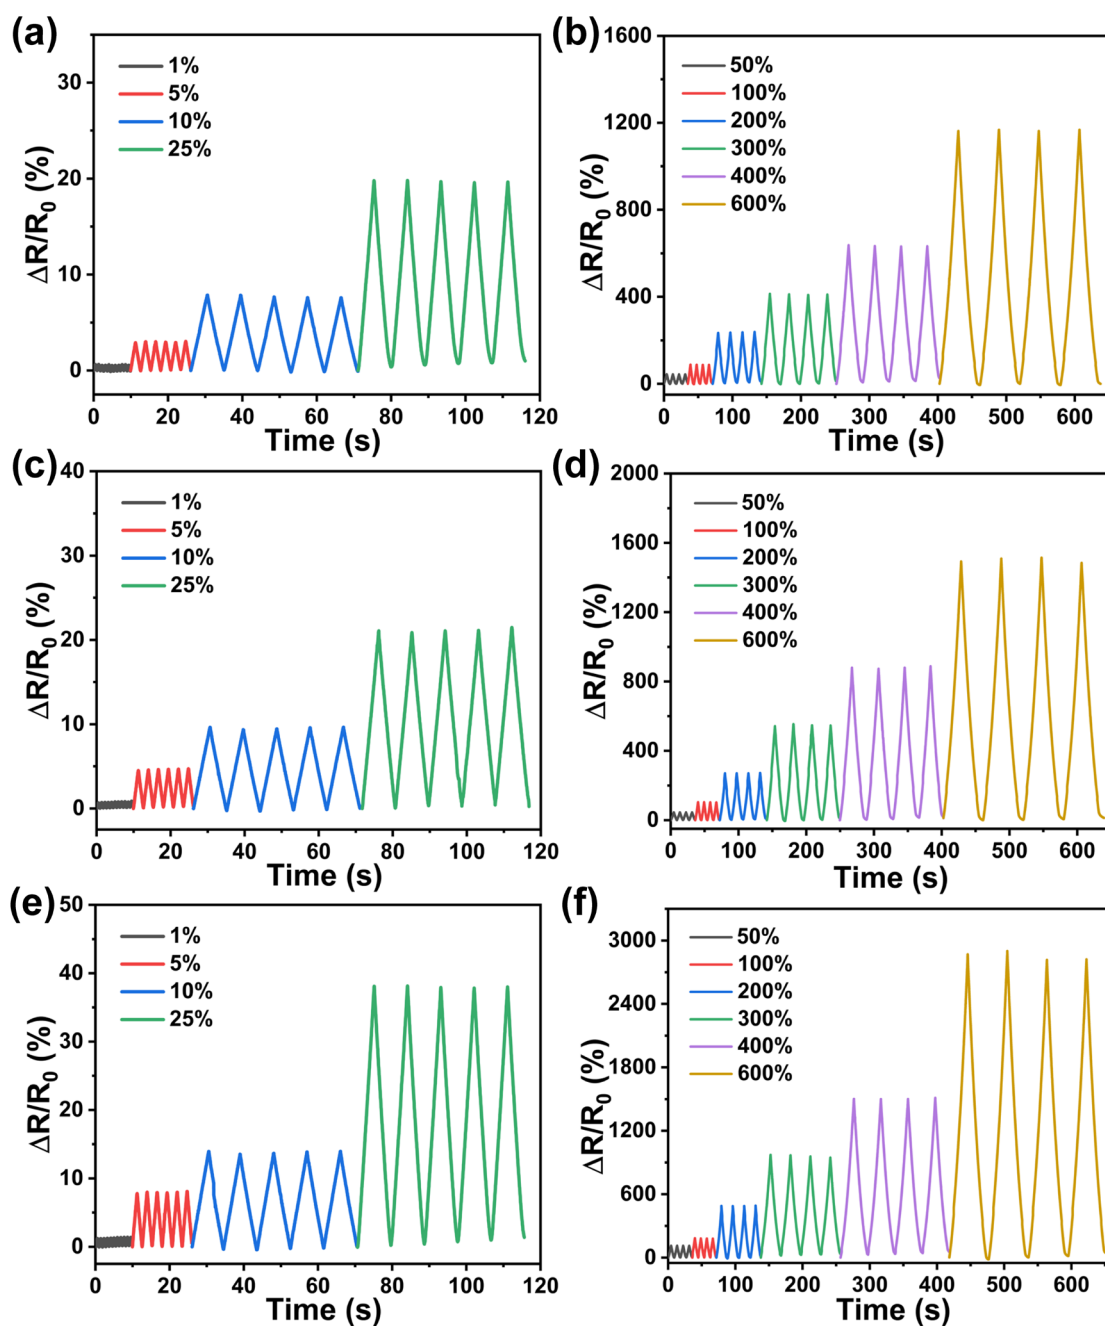

**Fig. S14** Real-time monitoring of the relative resistance changes of (a-b)  $\text{PEI}_{2.8}/\text{PAA}_9/\text{DES}_{78}$  ionogel, (c-d)  $\text{PEI}_{3.3}/\text{PAA}_9/\text{DES}_{75}$  ionogel, and (e-f)  $\text{PEI}_{4.7}/\text{PAA}_9/\text{DES}_{68}$  ionogel under different strains ranging from 1% to 600%.

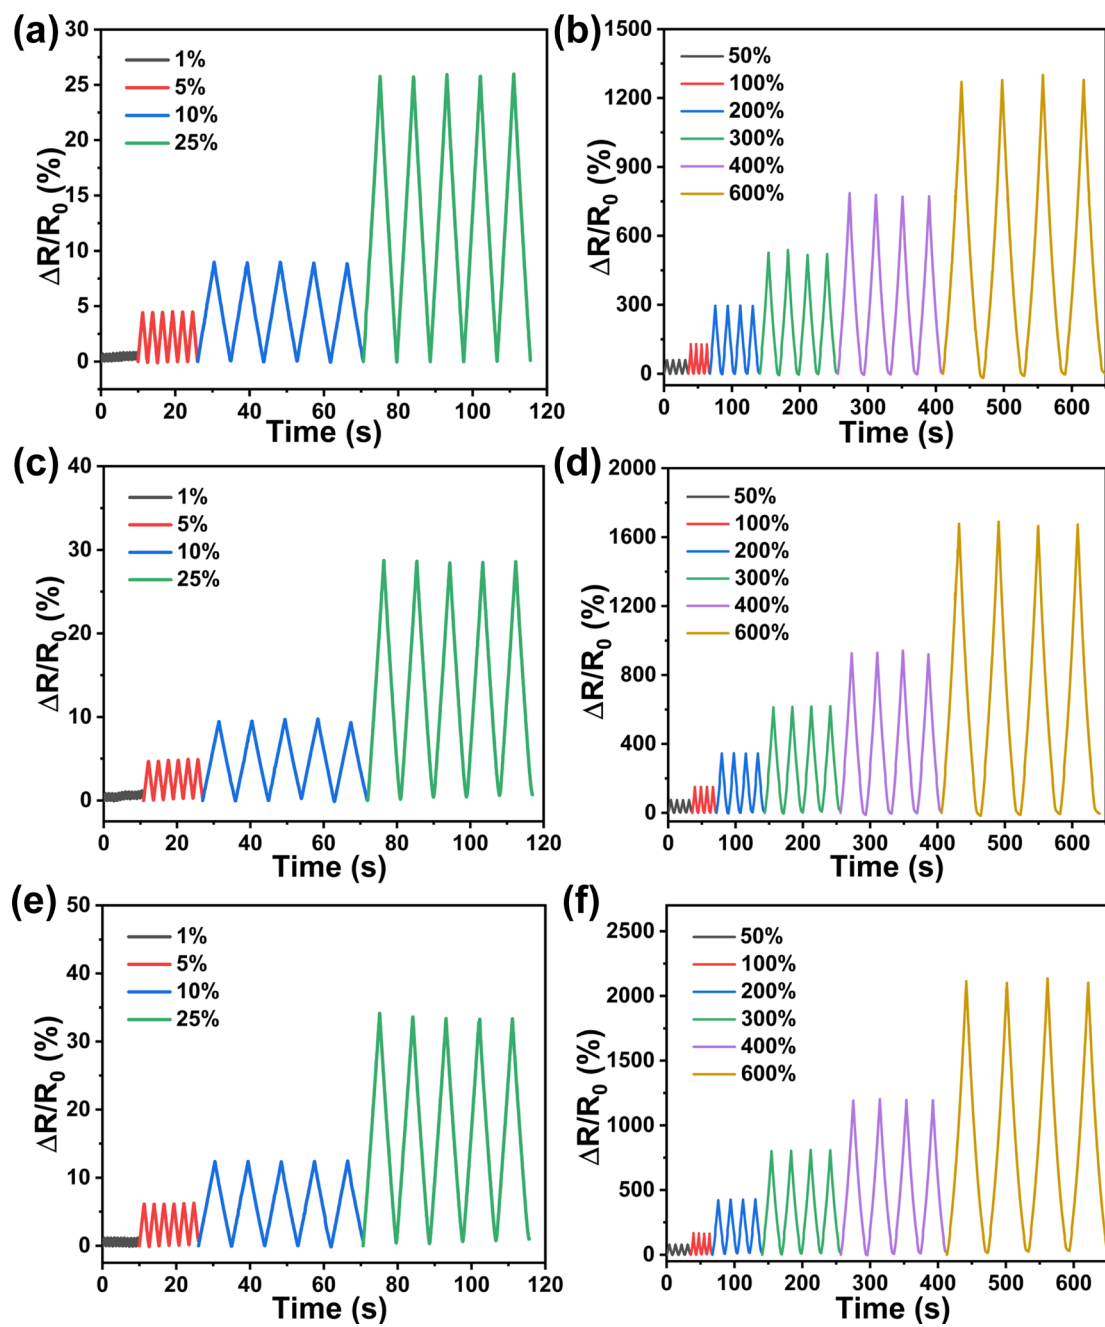

**Fig. S15** Real-time monitoring of the relative resistance changes of (a-b) PEI<sub>5.6</sub>/PAA<sub>6</sub>/DES<sub>72</sub> ionogel, (c-d) PEI<sub>4.9</sub>/PAA<sub>7</sub>/DES<sub>72</sub> ionogel, and (e-f) PEI<sub>3.2</sub>/PAA<sub>11</sub>/DES<sub>72</sub> ionogel under different strains ranging from 1% to 600%.

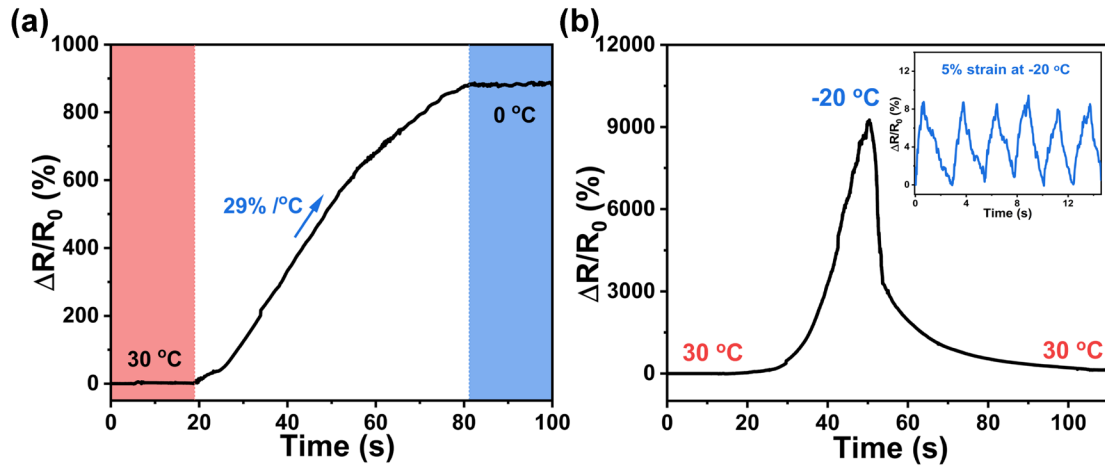

**Fig. S16** (a) Resistance changes of the PEI<sub>3.9</sub>/PAA<sub>9</sub>/DES<sub>72</sub> ionogel for temperature detection (from 30 to 0 °C). (b) Resistance changes of the PEI<sub>3.9</sub>/PAA<sub>9</sub>/DES<sub>72</sub> ionogel during the cooling and heating process (between 30 and -20 °C). The inset displayed the real-time relative resistance changes of PEI<sub>3.9</sub>/PAA<sub>9</sub>/DES<sub>72</sub> under 5% strain at -20 °C.

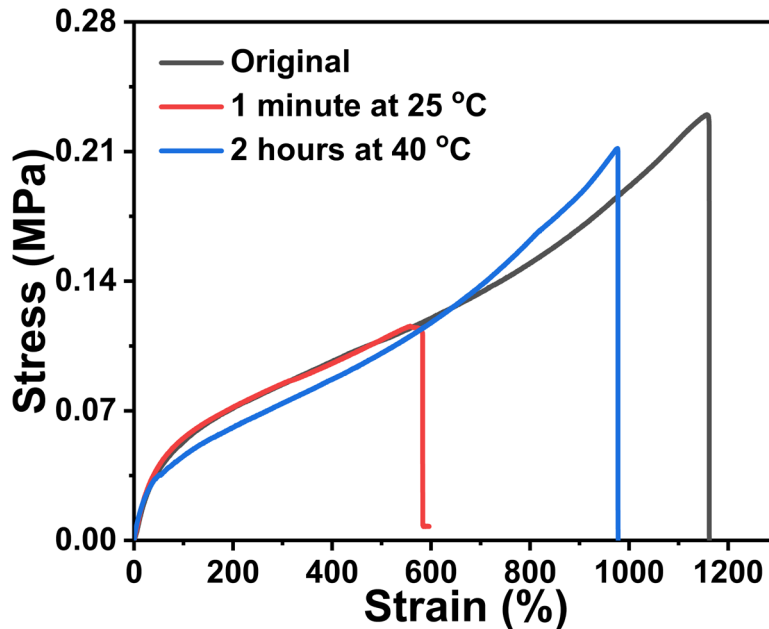

**Fig. S17** Representative stress-strain curves of original and healed ionogel samples at different healing times and temperature.

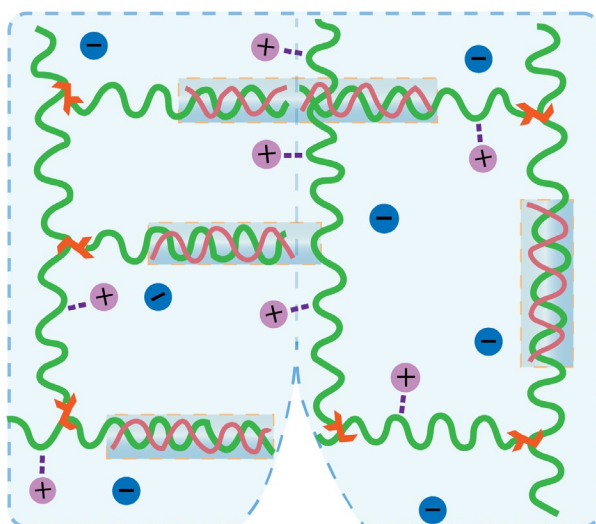

**Fig. S18** The probable self-healing mechanism of the PEI/PAA/DES ionogels.

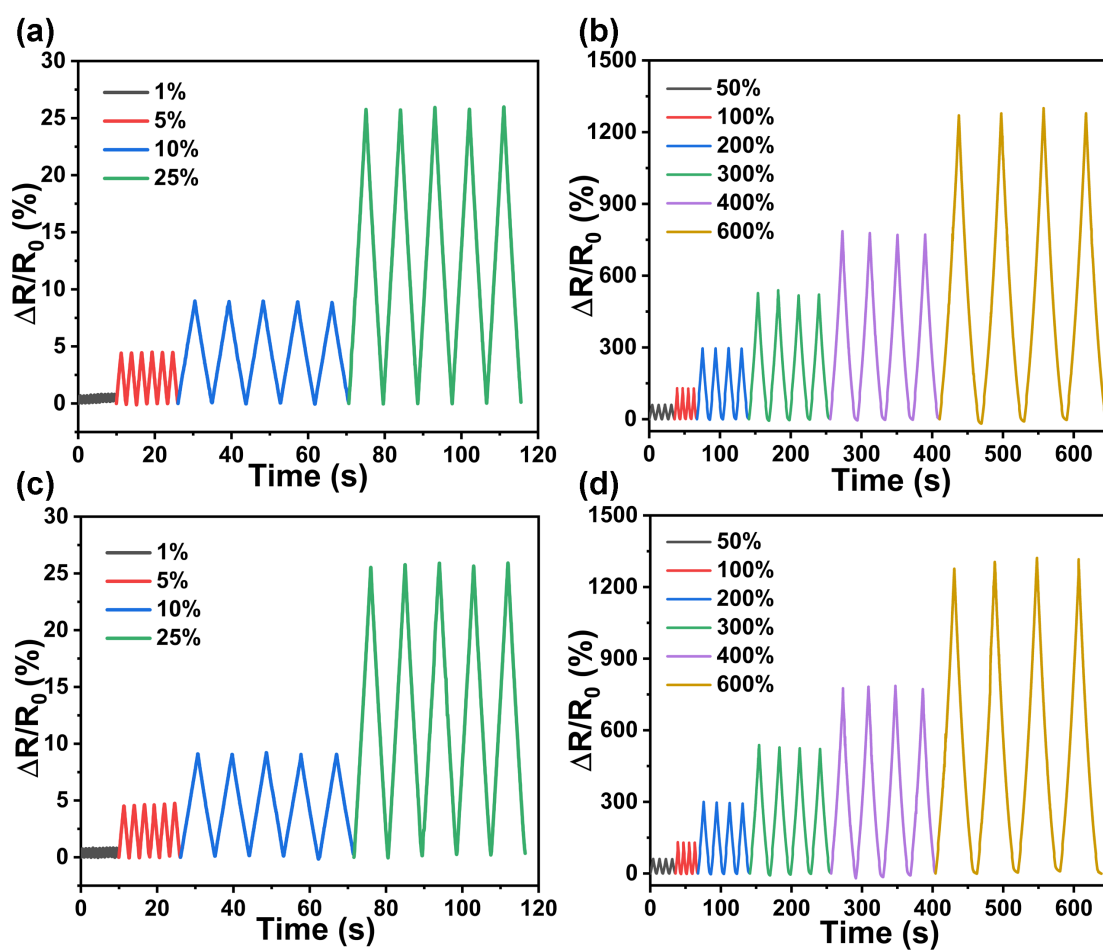

**Fig. S19** Real-time monitoring of relative resistance of (a-b) PEI<sub>5.6</sub>/PAA<sub>6</sub>/DES<sub>72</sub> and (c-d) healed PEI<sub>5.6</sub>/PAA<sub>6</sub>/DES<sub>72</sub> under different strains ranging from 1% to 600%.

**Table S2.** A brief comparison of overall performance between PEI<sub>3.9</sub>/PAA<sub>9</sub>/DES<sub>72</sub>-based strain sensor and representative ionogel-based sensors reported previously.

| <b>Ionogel-based sensor</b>                  | <b>GF</b> | <b>Maximum sensing range</b> | <b>Adhesive property (To glass)</b> | <b>Self-healing ability</b> | <b>Transmittance</b> | <b>Ref.</b> |
|----------------------------------------------|-----------|------------------------------|-------------------------------------|-----------------------------|----------------------|-------------|
| PEI/PAA/DES                                  | 4.68      | 600%                         | 350 KPa                             | Yes                         | 90%                  | This work   |
| PVA/PVP/[EMIm][DCA]                          | 1.85      | 400%                         | NA                                  | Yes                         | 85%                  | 1           |
| MMA/[VMIm][NTF <sub>2</sub> ]                | 2.3       | 300%                         | 280 KPa                             | NA                          | NA                   | 2           |
| P(TFEA-co-AAm)/ [EMIM][TFSI]                 | 1.85      | 600%                         | 1000 N/m                            | Yes                         | 92%                  | 3           |
| Chitosan/dextran-TA                          | 0.44      | 400%                         | 19.7 KPa                            | Yes                         | NA                   | 4           |
| PU/[DEIM][TFSI]                              | 1.54      | 300%                         | NA                                  | Yes                         | NA                   | 5           |
| PAA/[EMIM]Cl                                 | 1.6       | 200%                         | 32 KPa                              | NA                          | 90%                  | 6           |
| PU/[PMIM][EFSI]                              | 2.14      | 200%                         | NA                                  | Yes                         | 95%                  | 7           |
| P(VDF-co-HFP)/<br>P(MMA-co-BMA)/[EMIM][TFSI] | 1.62      | 150%                         | NA                                  | NA                          | 93%                  | 8           |
| P(ACMO/UA)/[EMIM][TFSI]                      | 1.56      | 300%                         | NA                                  | Yes                         | NA                   | 9           |
| PEA/[C <sub>2</sub> mim][NTf <sub>2</sub> ]  | 1.83      | 200%                         | NA                                  | NA                          | 95%                  | 10          |
| PUU/ [EMIm][DCA]                             | 4.64      | 300%                         | Yes                                 | Yes                         | 93%                  | 11          |

<sup>a)</sup> NA: not applicable

## References

1. D. Weng, F. Xu, X. Li, S. Li, Y. Li and J. Sun, *ACS Appl. Mater. Interfaces*, 2020, **12**, 57477-57485.
2. J. Tie, Z. Mao, L. Zhang, Y. Zhong, X. Sui and H. Xu, *Compos. Pt. B-Eng.*, 2022, **232**, 109612.
3. L. Xu, Z. Huang, Z. Deng, Z. Du, T. L. Sun, Z.-H. Guo and K. Yue, *Adv. Mater.*, 2021, **33**, 2105306.
4. Y. Zhang, J. Xu and H. Wang, *RSC Adv.*, 2021, **11**, 37661-37666.
5. T. Li, Y. Wang, S. Li, X. Liu and J. Sun, *Adv. Mater.*, 2020, **32**, 2002706.
6. J. Sun, R. Li, G. Lu, Y. Yuan, X. Zhu and J. Nie, *J. Mater. Chem. C*, 2020, **8**, 8368-8373.
7. J. Xu, H. Wang, X. Du, X. Cheng, Z. Du and H. Wang, *Chem. Eng. J.*, 2021, **426**, 130724.
8. J. Lan, Y. Li, B. Yan, C. Yin, R. Ran and L.-Y. Shi, *ACS Appl. Mater. Interfaces*, 2020, **12**, 37597-37606.
9. M. Zhang, X. Tao, R. Yu, Y. He, X. Li, X. Chen and W. Huang, *J. Mater. Chem. A*, 2022, **10**, 12005-12015.
10. Z. Cao, H. Liu and L. Jiang, *Mater. Horizons*, 2020, **7**, 912-918.
11. L. Chen and M. Guo, *ACS Appl. Mater. Interfaces*, 2021, **13**, 25365-25373.
